# Supplementary material
Source: publisher figshare collection journal article supplement (https://frontiersin.figshare.com/ndownloader/files/30637602)
Supplement: Supplementary file [file 30637602]

**A**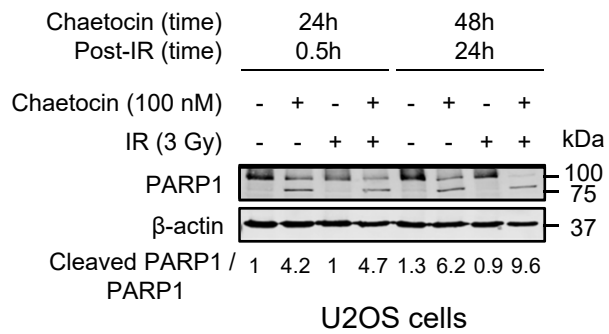**B**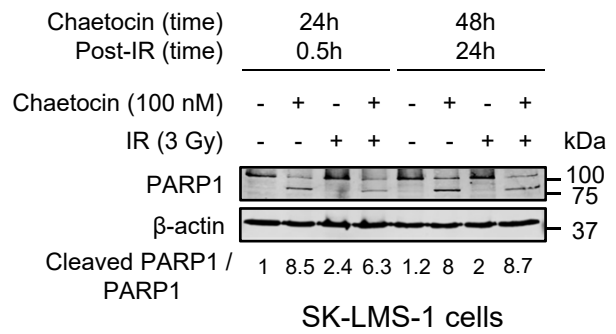

**Supplementary Figure 11.** Chaetocin induces apoptotic PARP1 cleavage in response to DNA damage caused by IR in sarcoma cells. **A.** Effect of chaetocin and/or IR on PARP1 cleavage at different points in time in U2OS osteosarcoma cells deprived of serum mitogenic signals. **B.** Effect of chaetocin and/or IR on PARP1 cleavage at different time points in SK-LMS-1 leiomyosarcoma cells.
